# Supplementary material for: Associations Between Storm Exposure Patterns and Metabolic Syndrome Risk in Chinese Adults: A CHARLS-Based Prospective Cohort Study
Source: Research Square preprint supplement (doi:10.21203/rs.3.rs-7504116/v1), 2025-10-01
Supplement: Supplementary file 2 [file 5e09b5a90d8381a420397640.xlsx]

## Sheet: Sheet 1
Term
